# Supplementary material for: Type 2 diabetes induced microbiome dysbiosis is associated with therapy resistance in pancreatic adenocarcinoma
Source: Springer Nature journal article supplement (doi:10.1186/s12934-020-01330-3), 2020-03-24
Supplement: 12934_2020_1330_MOESM2_ESM.pdf [file 12934_2020_1330_MOESM2_ESM.pdf]

A.

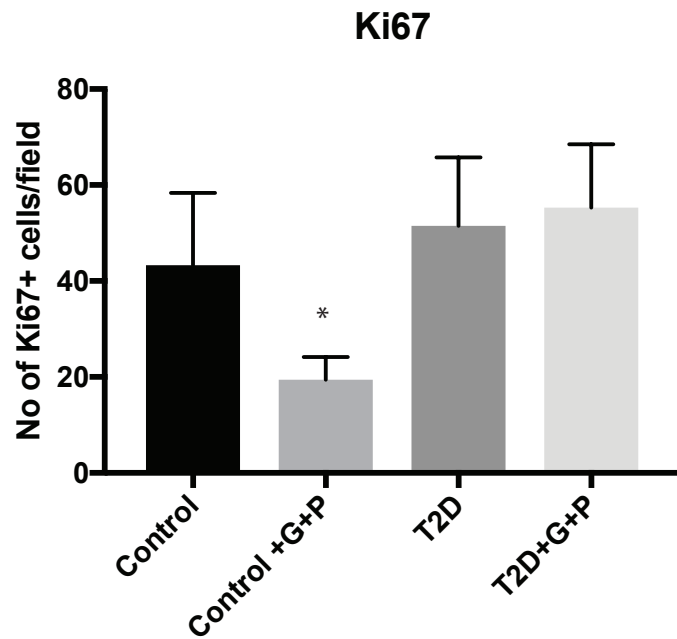

B.

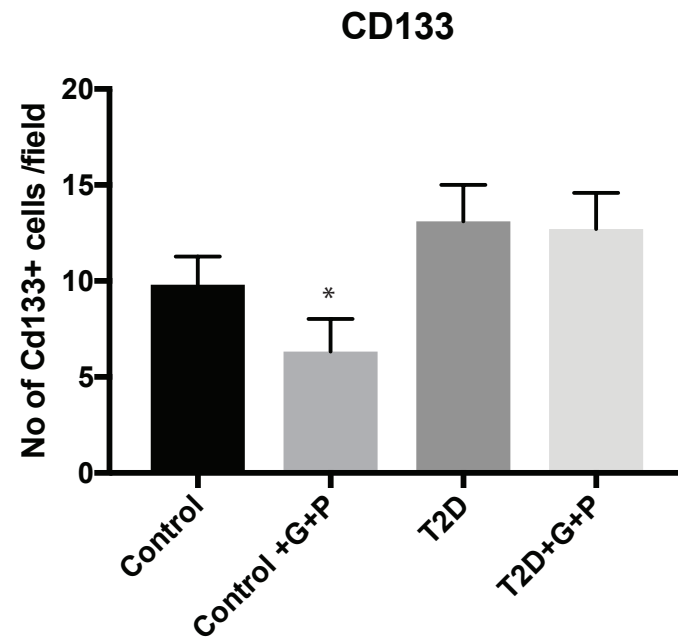

Supplementary Figure 2
